# Supplementary material for: Hydrogen bonding-regulated miscibility of graphene oxide and nonionic water-soluble polymers
Source: Royal Society of Chemistry journal article supplement (doi:10.1039/d4nr02995j), 2024-01-01
Supplement: d4nr02995j1.pdf [file d4nr02995j1.pdf]

# Supporting Information

## Hydrogen Bond Regulating Miscibility of Graphene Oxide and Nonionic Water-Soluble Polymers

*Rui Guo<sup>1</sup>, Lidan Wang<sup>1</sup>, Feifan Chen<sup>1</sup>, Kaiwen Li<sup>1</sup>, Yue Gao<sup>1</sup>, Chenwei Shen<sup>1</sup>, Xuan  
Ye<sup>1</sup>, Senping Liu<sup>1</sup>, Ya Wang<sup>1</sup>, Zeshen Li<sup>1</sup>, Peng Li<sup>1</sup>, Zhen Xu<sup>1,2, \*</sup>, Yingjun Liu<sup>1,2, \*</sup>, and  
Chao Gao<sup>1,2, \*</sup>*

<sup>1</sup> MOE Key Laboratory of Macromolecular Synthesis and Functionalization, Department of  
Polymer Science and Engineering, Key Laboratory of Adsorption and Separation Materials &  
Technologies of Zhejiang Province, Zhejiang University, Hangzhou 310027, China

<sup>2</sup> Shanxi-Zheda Institute of Advanced Materials and Chemical Engineering, Taiyuan 030000,  
China

# Table of contents

**Fig S1.** (a) Chemical structure of GO and PVA. (b) XPS spectrum of GO.

**Fig S2.** Statistical results of the size of GO sheets with and without adding PVA.

**Fig S3.** Digital and OM images of aggregated GO-PVA mixture with low concentration at room temperature before and after ultrasonication.

**Fig S4.** OM images of inhomogeneous high concentration GO-PVA mixture and homogeneous pure GO.

**Fig S5.** Critical PVA content in GO under different alcoholysis degree of 88% and 99%.

**Fig S6.** Digital images of GO-PVA mixture at different mass fraction and molecular weight and fixed alcoholysis degree of 88% and 99%.

**Fig S7.** OM images of GO-PVA mixture at different mass fraction and molecular weight and fixed alcoholysis degree of 88% and 99%.

**Fig S8.** OM images of GO-PVA mixture at different mass fraction over the concentrated range at fixed PVA with molecular weight of 22 kDa and alcoholysis degree of 88% .

**Fig S9.** SEM images of GO-PVA mixture at different temperature.

**Fig S10.** Digital and OM images of homogeneous GO-PVA (114.4 kDa and alcoholysis degree of 88%) mixture after preheating.

**Fig S11.** Digital and OM images of aggregated GO-PVA mixture by heating and stirring for 3h after cooling at 5 °C.

**Fig S12.** The surface height profile image of P-GO-PVA and R-GO-PVA.

**Fig S13.** Stress–strain curves of P-GO-PVA and R-GO-PVA with different GO content in PVA.

**Fig S14.** Digital photos and SEM images of transverse cross section of homogeneous GO-PVA-SiO<sub>2</sub> and aggregated GO-PVA-SiO<sub>2</sub>.

**Fig S15.** Typical stress–strain curves and mechanical properties of homogeneous GO-PVA-SiO<sub>2</sub> and aggregated GO-PVA-SiO<sub>2</sub>.

**Fig S16.** Digital and optical microscope images of homogeneous GO-PVA -SiO<sub>2</sub> dispersions with different molecular weight of PVA.

**Fig S17.** Digital and optical microscope images of homogeneous GO-PVA -Gly dispersions with different molecular weight of PVA.

**Fig S18.** Digital and optical microscope images of GO-PEO, GO-HEC and GO-PVP dispersions before and after preheating at 85 °C.

**Fig S19.** Digital and optical microscope images of homogeneous GO-PVP/PEO/HEC-SiO<sub>2</sub>.

**Fig S20.** Digital and optical microscope images of homogeneous GO-PVP/PEO/HPC -Gly.

**Table S1.** The miscibility rule of GO and PVA over the concentrated range.

(a)

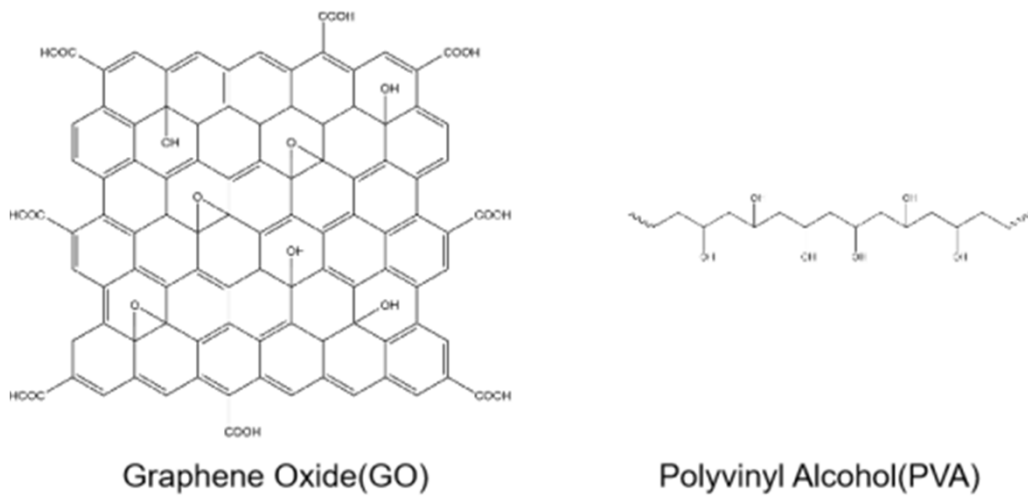

(b)

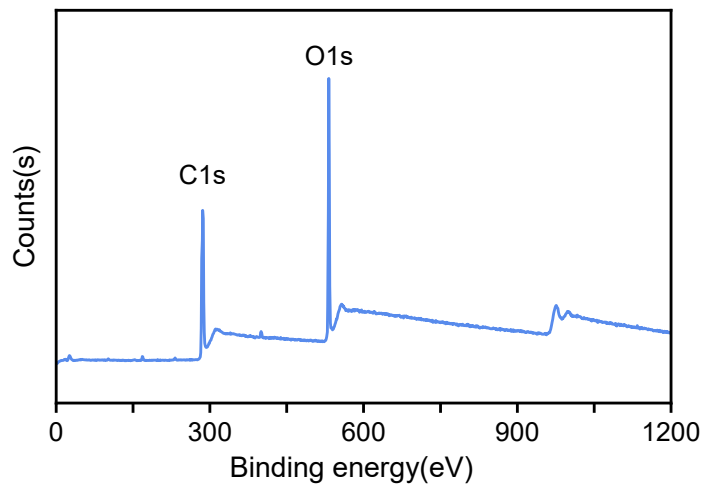

**Fig S1.** (a) Chemical structure of GO and PVA. (b) XPS spectrum of GO.

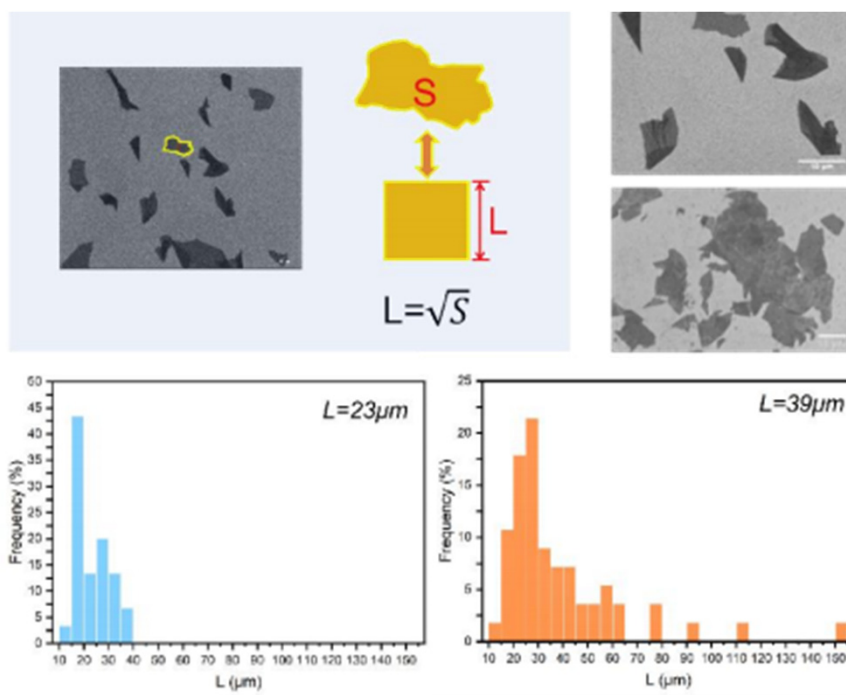

**Fig S2.** Statistical results of the size of GO sheets with (orange) and without (blue) adding PVA. The mean size of the former is 39  $\mu\text{m}$  and the latter is 23  $\mu\text{m}$ . The sampling number is over 200 sheets.

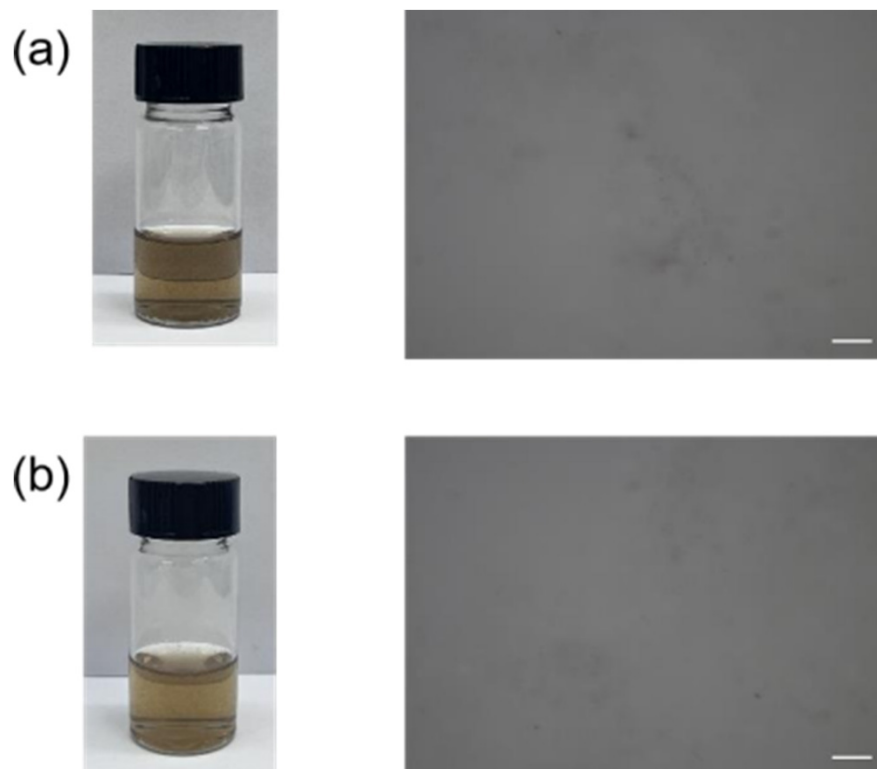

**Fig S3.** Digital and OM images of aggregated GO-PVA mixture with low concentration at room temperature before (a) and after ultrasonication (b). Scale bars are 100  $\mu\text{m}$ .

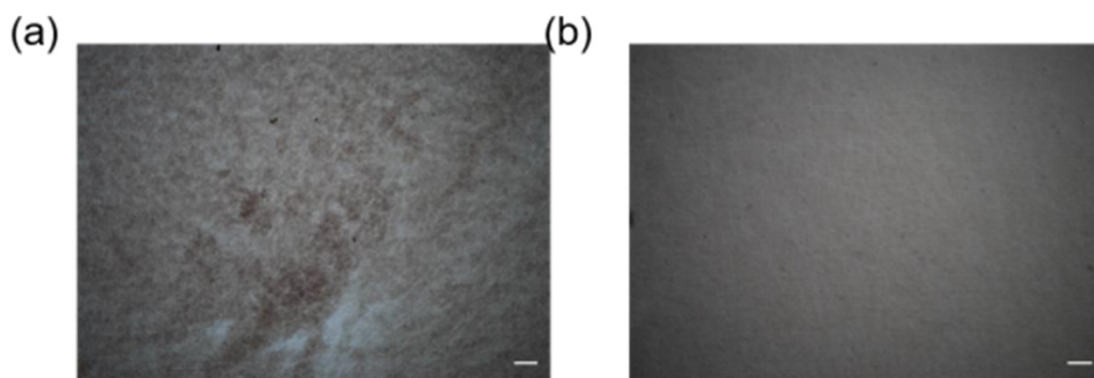

**Fig S4.** OM images of inhomogeneous high concentration GO-PVA mixture (a) and homogeneous pure GO(b). Scale bars are 100  $\mu\text{m}$ .

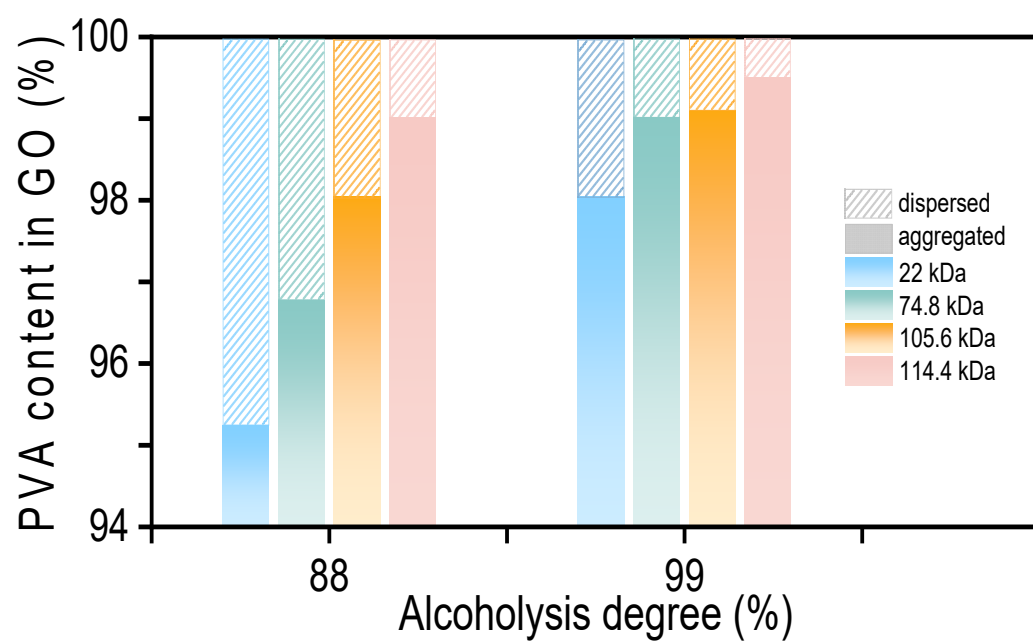

**Fig S5.** Critical PVA content in GO under diifferent alholysis degree of 88% and 99%.



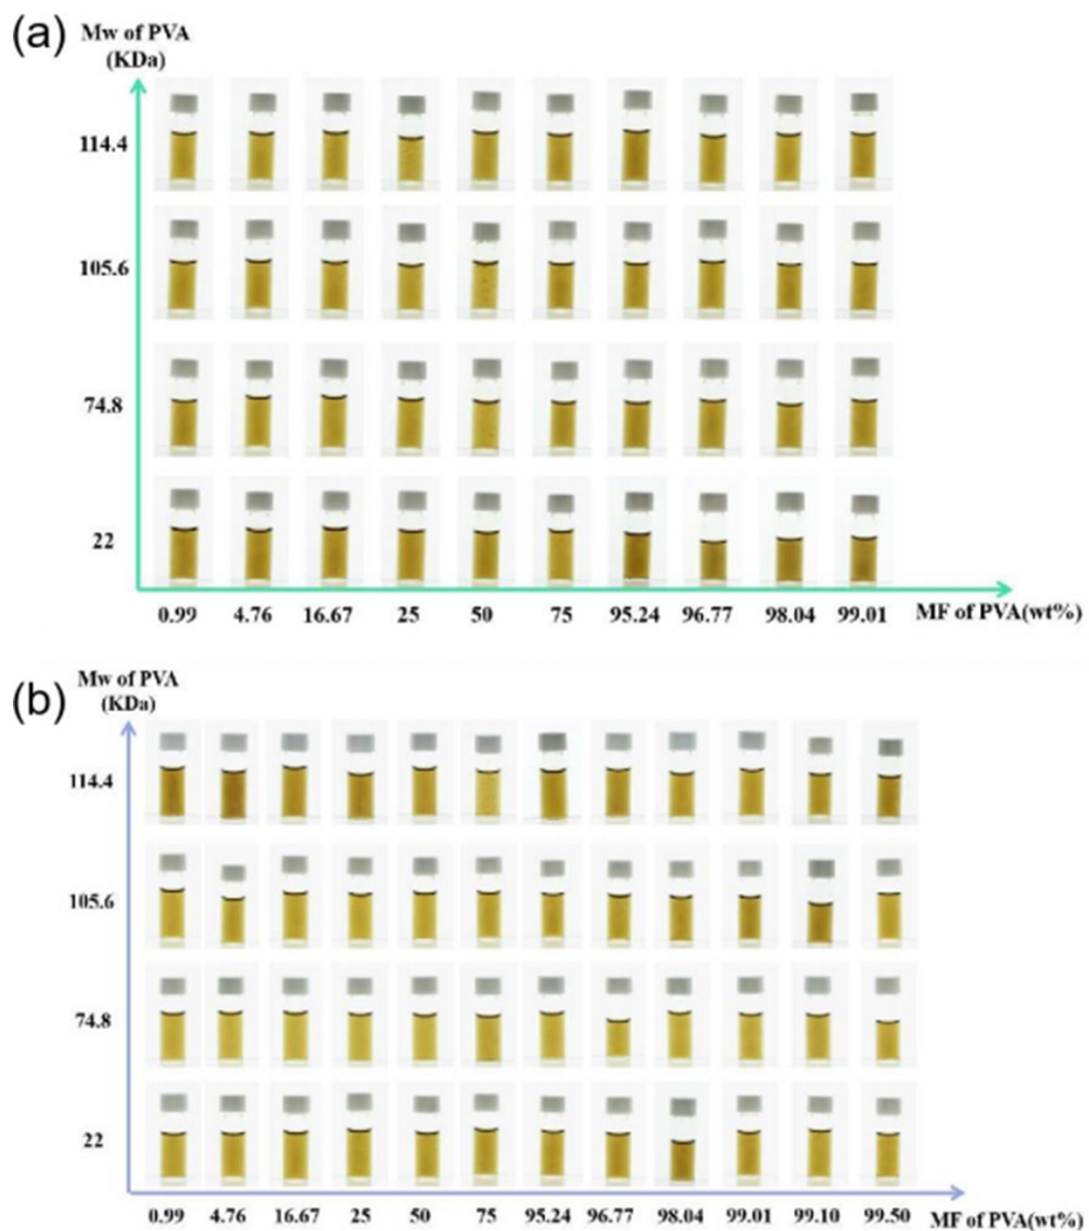

**Fig S6.** Digital images of GO-PVA mixture at different mass fraction and molecular weight and fixed alcoholysis degree of 88% (a) and 99% (b).

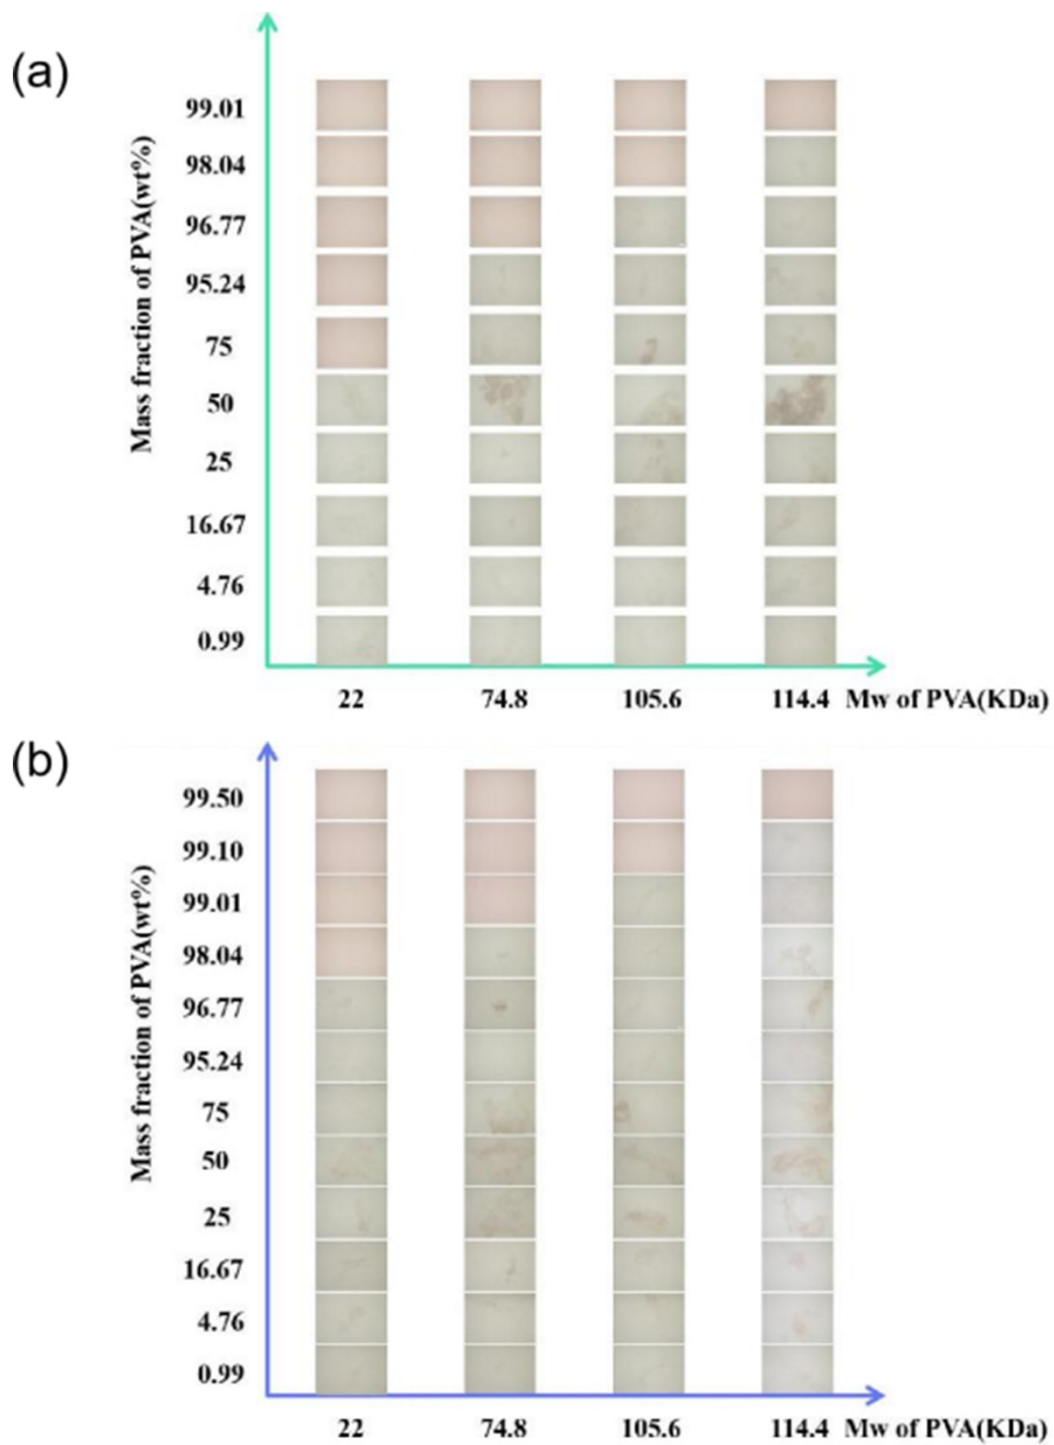

**Fig S7.** OM images of GO-PVA mixture at different mass fraction and molecular weight and fixed alcoholysis degree of 88% (a) and 99% (b). Scale bars are 100  $\mu\text{m}$ .

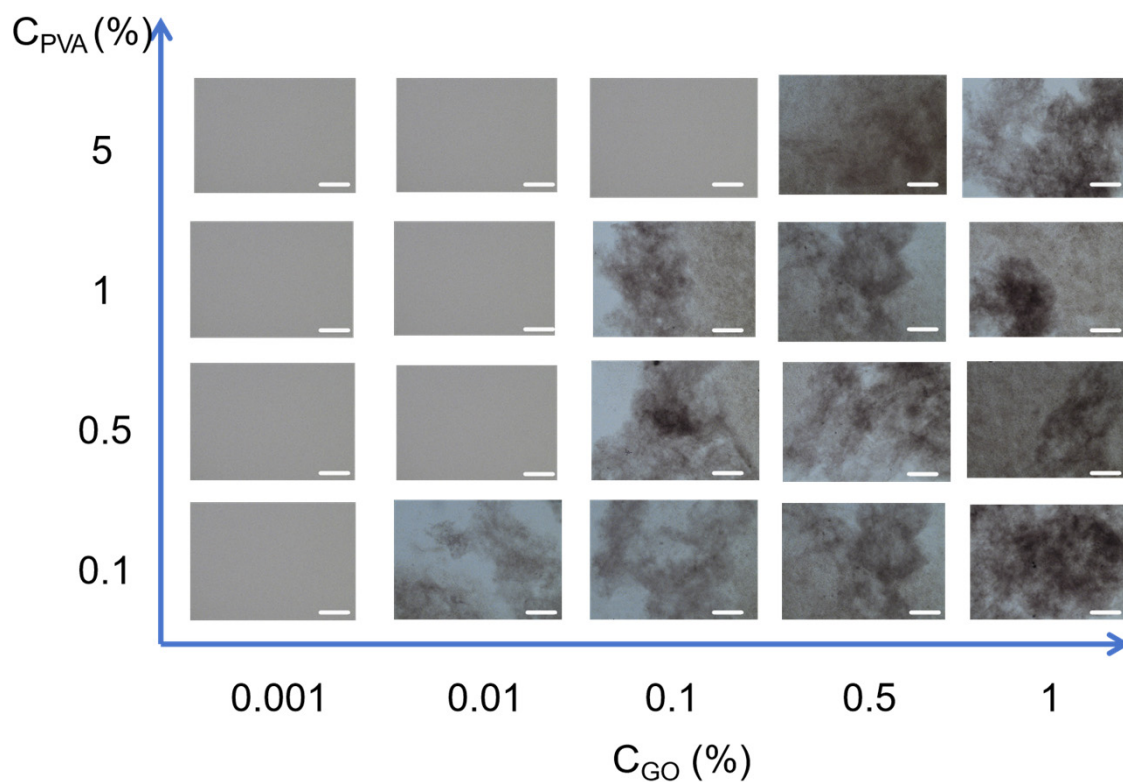

**Fig S8.** OM images of GO-PVA mixture at different mass fraction over the concentrated range at fixed PVA with molecular weight of 22 kDa and alcoholysis degree of 88% .Scale bars are 100  $\mu\text{m}$ .

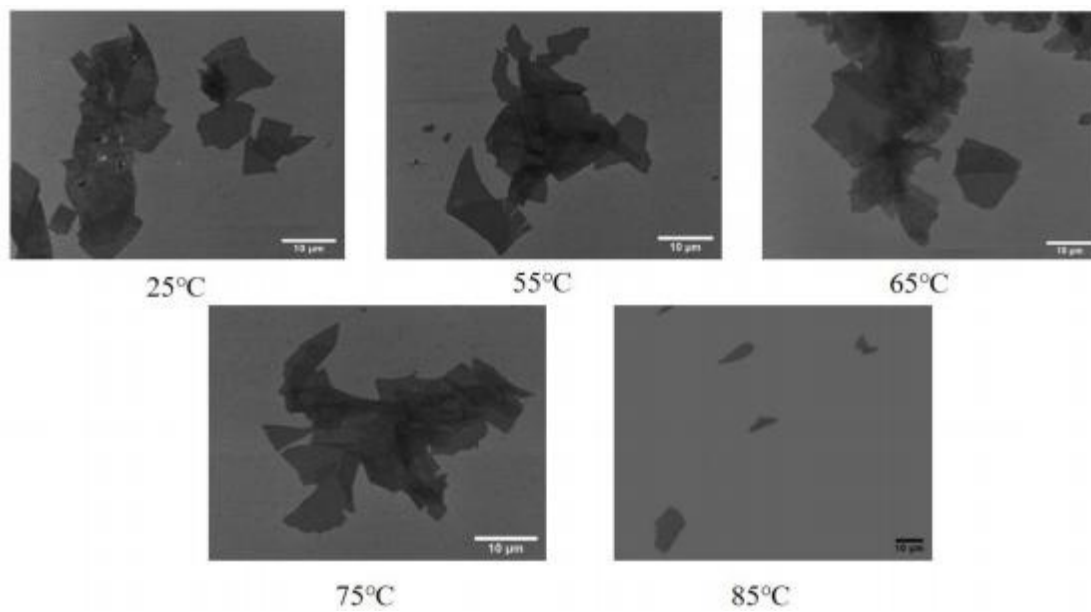

**Fig S9.** SEM images of GO-PVA mixture at different temperature.

(a)

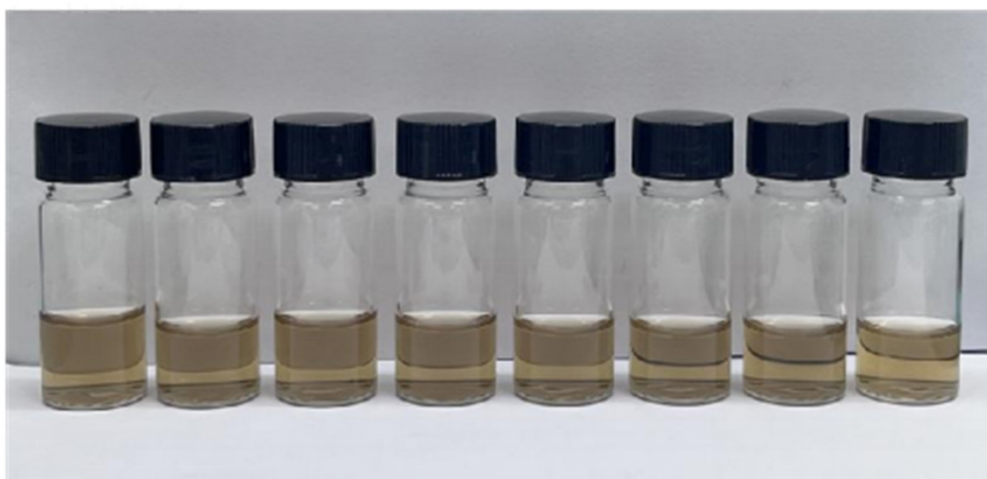

(b)

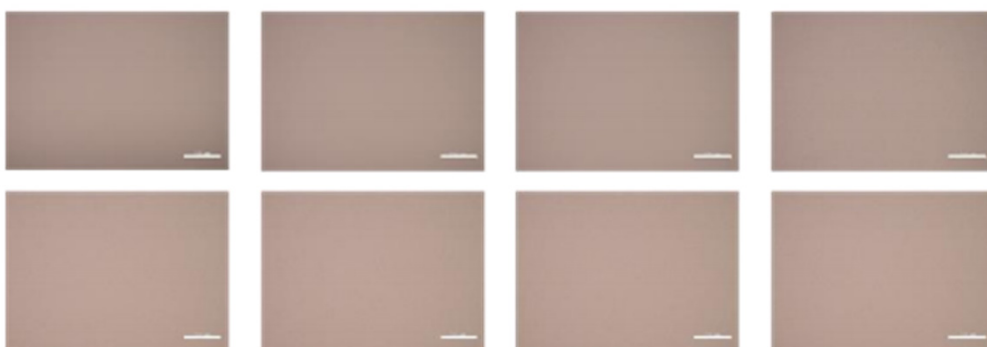

**Fig S10.** Digital (a) and OM (b) images of homogeneous GO-PVA (114.4 kDa and alcoholysis degree of 88%) mixture after preheating. Scale bars are 100  $\mu\text{m}$ .

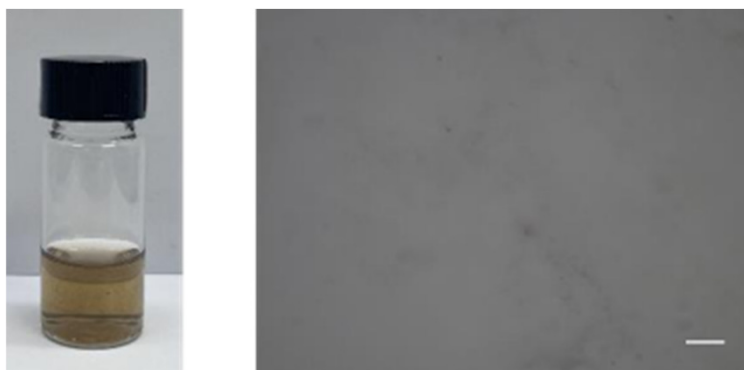

**Fig S11.** Digital and OM images of aggregated GO-PVA mixture by heating and stirring for 3h after cooling at 5 °C. Scale bars are 100  $\mu\text{m}$ .

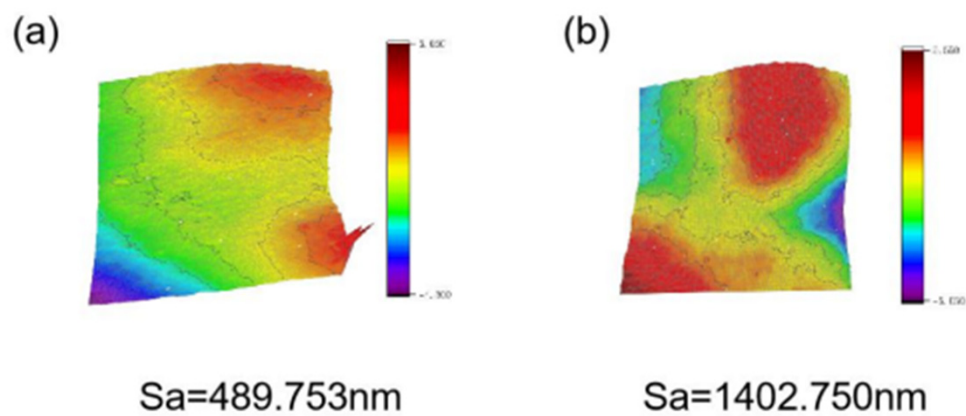

**Fig S12.** The surface height profile image of P-GO-PVA (a) and R-GO-PVA (b).

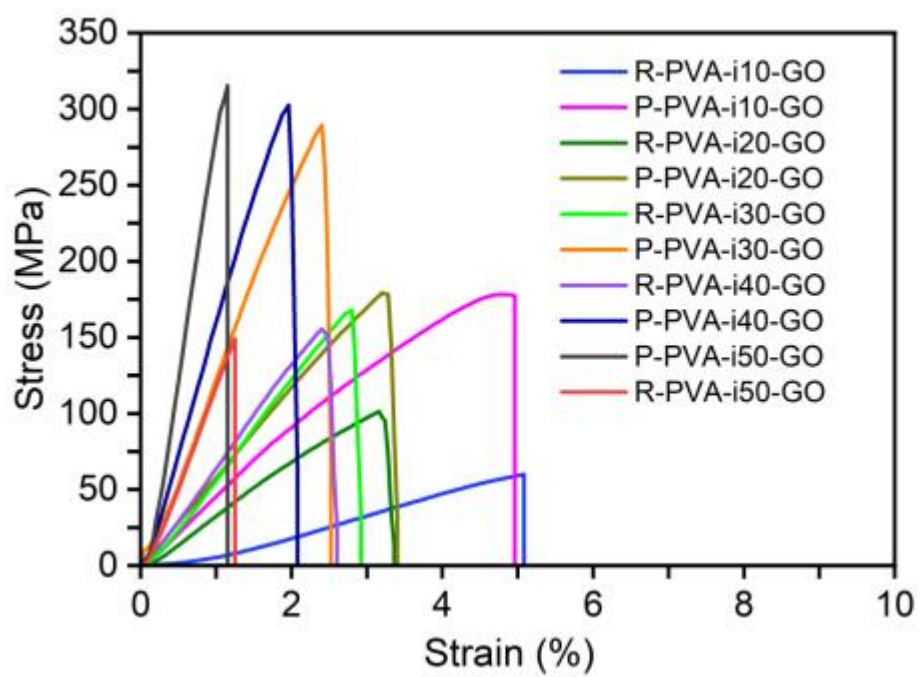

**Fig S13.** Stress–strain curves of P-GO-PVA and R-GO-PVA with different GO content in PVA.



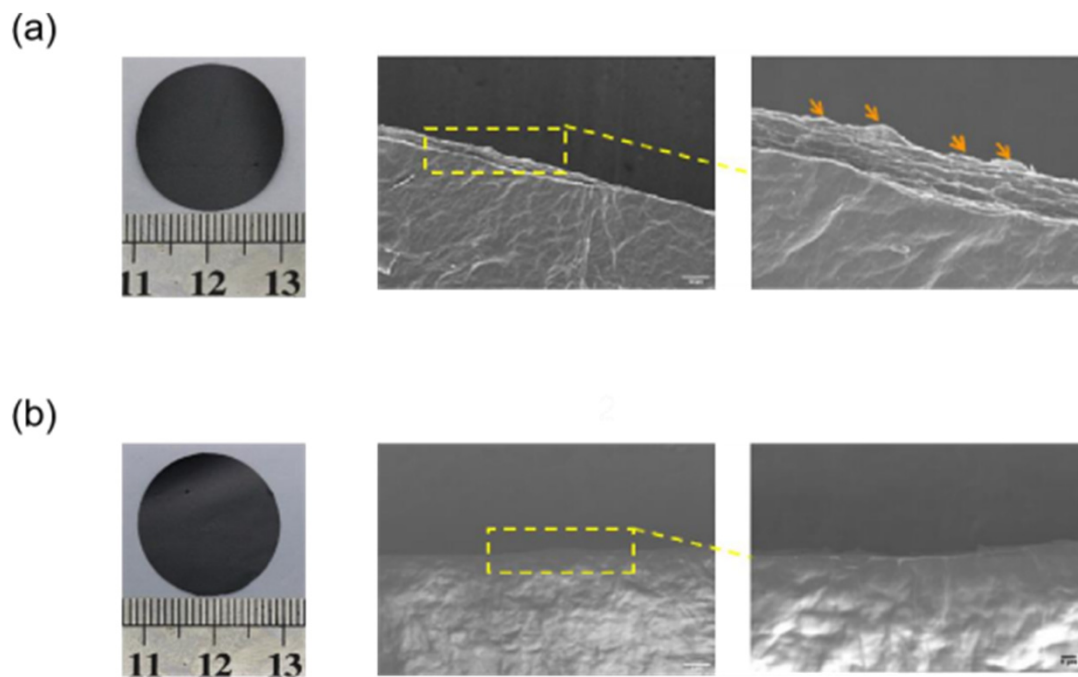

**Fig S14.** Digital photos and SEM images of transverse cross section of homogeneous GO-PVA-SiO<sub>2</sub> (a) and aggregated GO-PVA-SiO<sub>2</sub> (b).

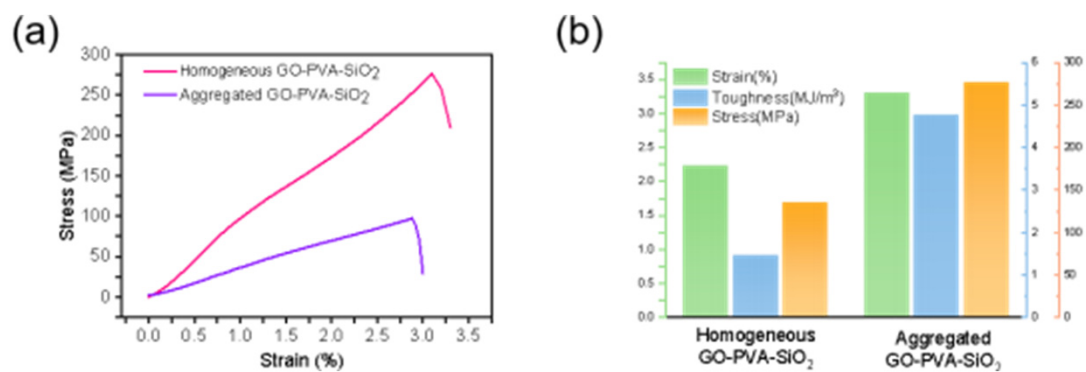

**Fig S15.** Typical stress–strain curves (a) and mechanical properties (b) of homogeneous GO-PVA-SiO<sub>2</sub> and aggregated GO-PVA-SiO<sub>2</sub>.

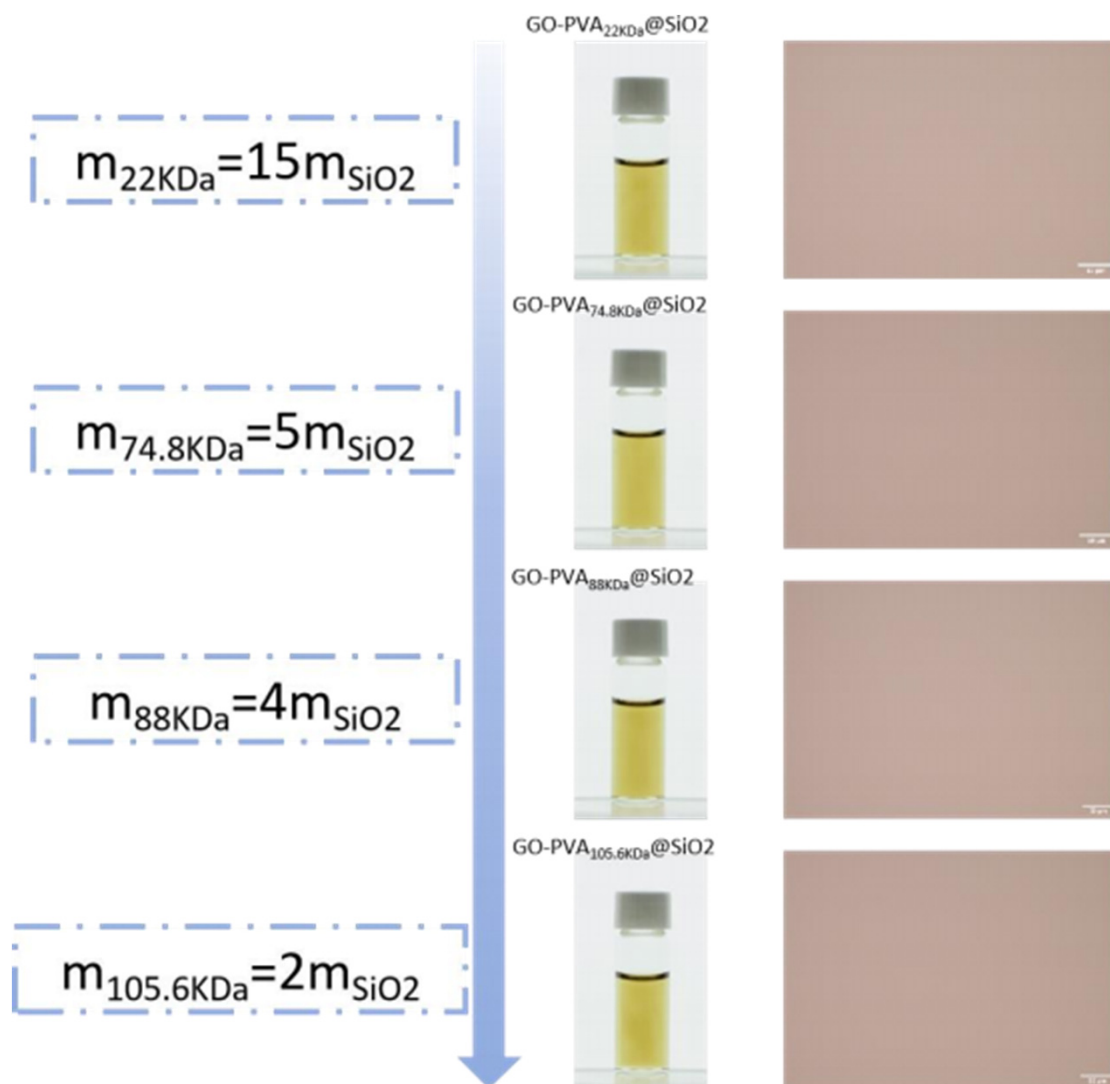

**Fig S16.** Digital and optical microscope images of homogeneous GO-PVA -SiO<sub>2</sub> dispersions with different molecular weight of PVA.

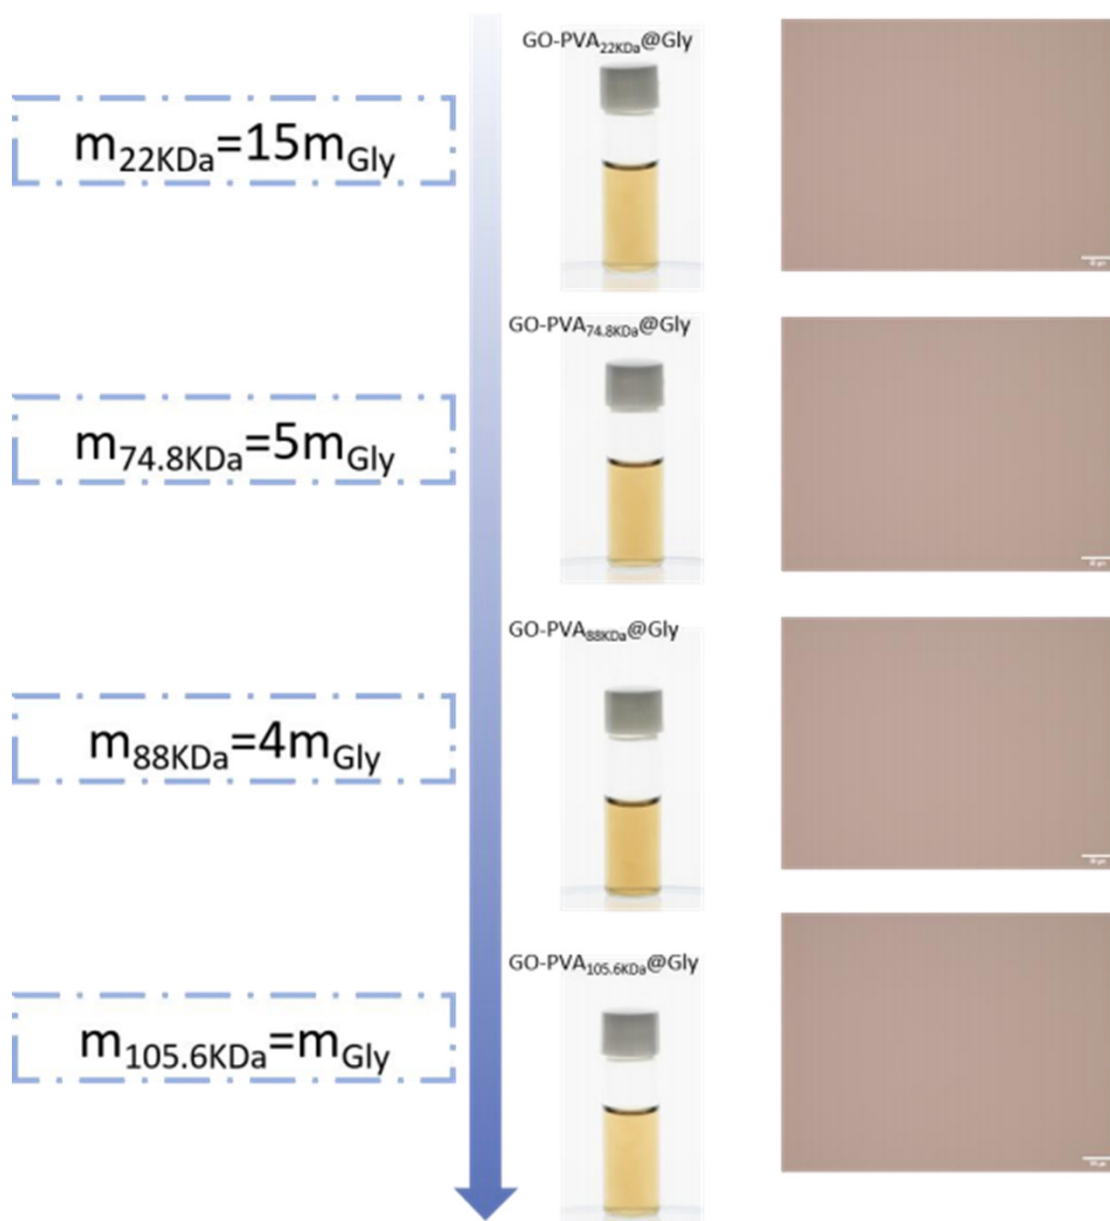

**Fig S17.** Digital and optical microscope images of homogeneous GO-PVA -Gly dispersions with different molecular weight of PVA.

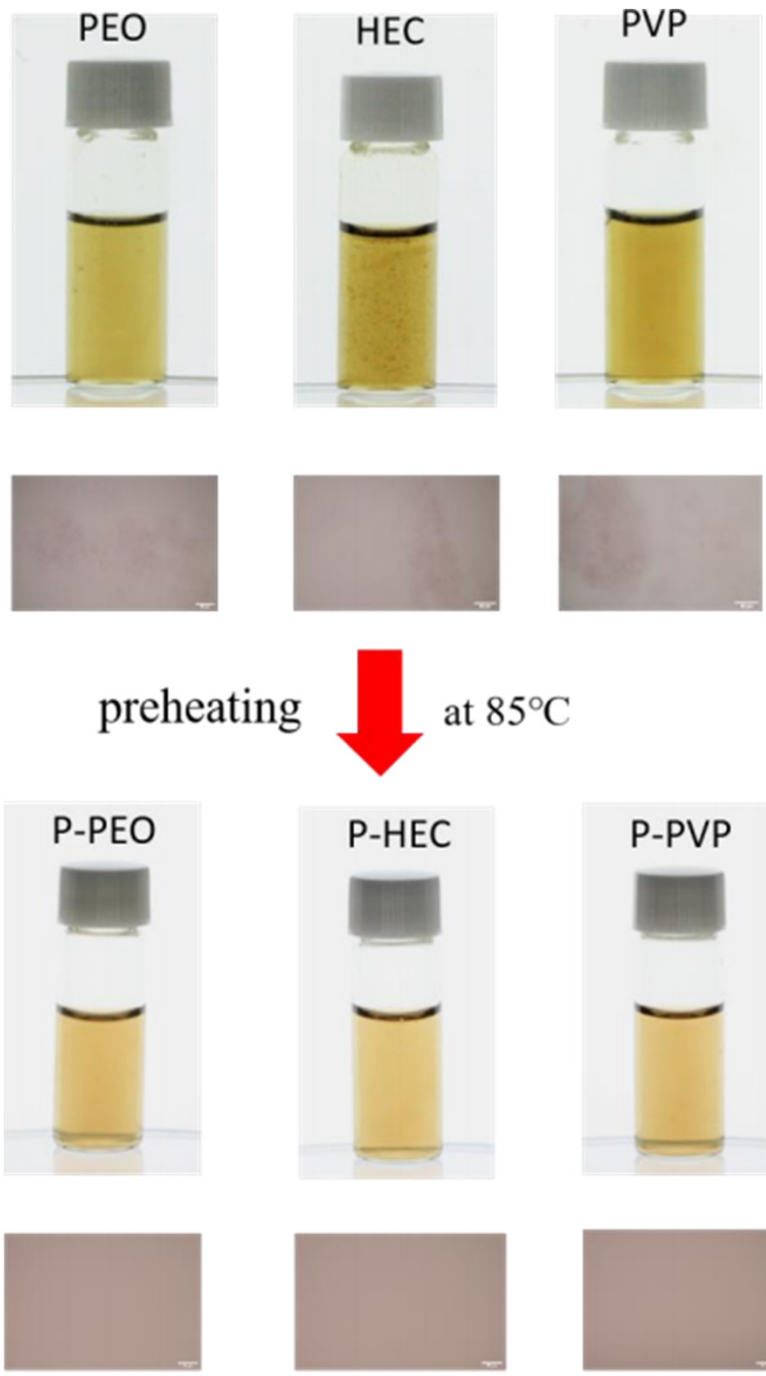

**Fig S18.** Digital and optical microscope images of GO-PEO, GO-HEC and GO-PVP dispersions before and after preheating at 85 °C.

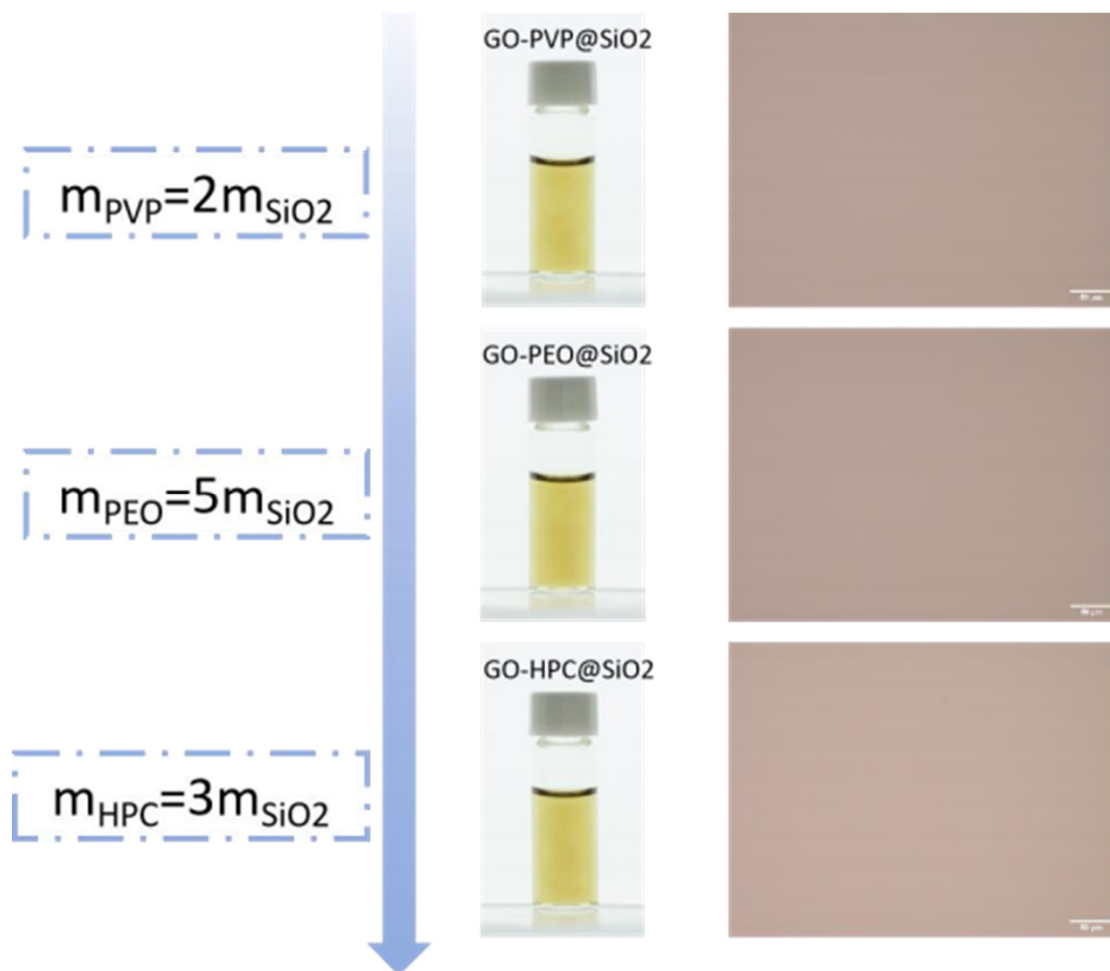

**Fig S19.** Digital and optical microscope images of homogeneous GO-PVP/PEO/HPC -SiO<sub>2</sub>.

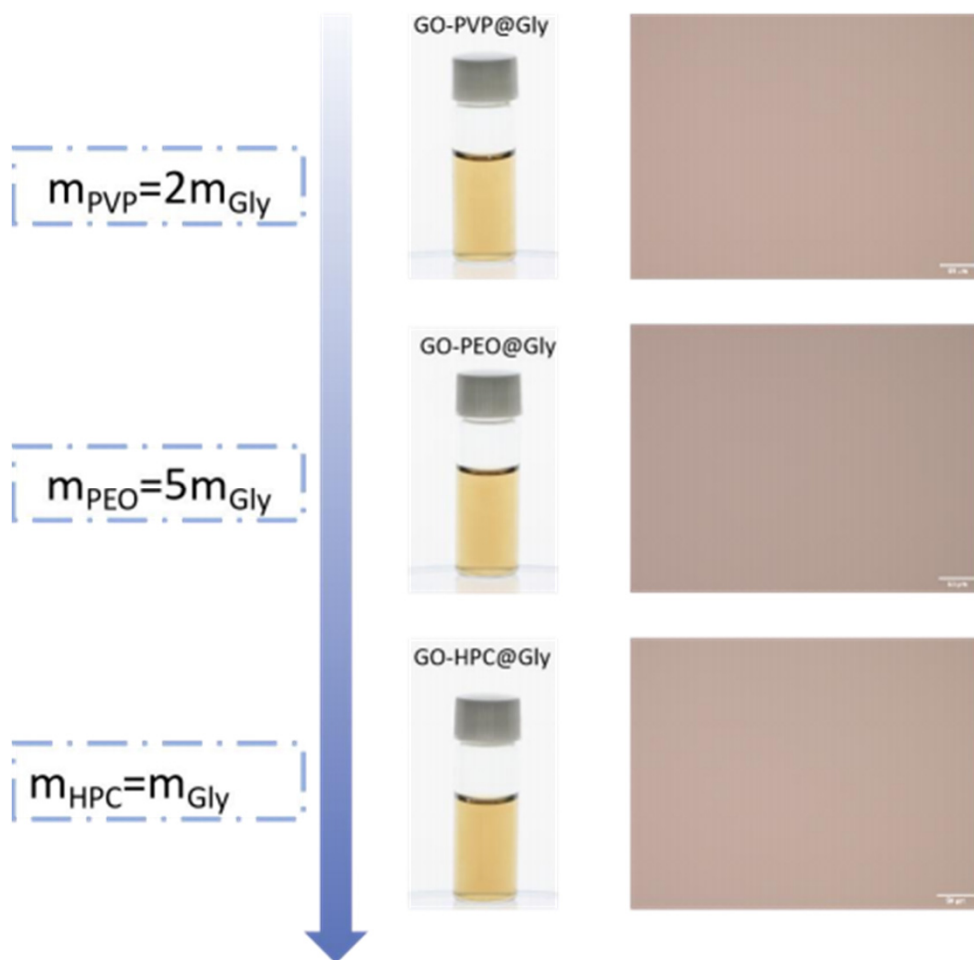

**Fig S20.** Digital and optical microscope images of homogeneous GO-PVP/PEO/HPC -Gly.

**Table S1.** The miscibility rule of GO and PVA over the concentrated range

---

| $C_{GO}$ (%) | $C_{PVA}$ (%) |     |   |   |
|--------------|---------------|-----|---|---|
|              | 0.1           | 0.5 | 1 | 5 |
| 0.001        | √             | √   | √ | √ |
| 0.01         | ×             | √   | √ | √ |
| 0.1          | ×             | ×   | × | √ |
| 0.5          | ×             | ×   | × | × |
| 1            | ×             | ×   | × | × |

---

Notes: “√” means miscible and “×” means aggregated

---
